# Supplementary material for: Exploiting arginine distributions for the selective and efficient depletion of arginine-rich plasma proteins
Source: Royal Society of Chemistry journal article supplement (doi:10.1039/d0cc04744a), 2020-01-01
Supplement: d0cc04744a1.pdf [file d0cc04744a1.pdf]

## **Electronic Supplementary Information**

### **Exploiting the arginine distributions for selective and efficient depletion of arginine-rich plasma proteins**

Xue Hu, Jian-Hua Wang, Xu-Wei Chen\*

*Research Center for Analytical Sciences, Department of Chemistry, College of Sciences,  
Northeastern University, Box 332, Shenyang 110819, China*

Corresponding author: E-mail: [chenxuwei@mail.neu.edu.cn](mailto:chenxuwei@mail.neu.edu.cn) (X.W. Chen);

Tel: +86 83684533; Fax: +86 83676698

## Experimental section

### Materials and reagents

Human plasma albumin (HSA, A9731), immunoglobulin G (IgG, I4506), transferrin (Trf, T3309), conalbumin (Cona, C0880), lactoferrin (Lf, L9507), lysozyme (Lys, F62970), concanavalin A (ConA, L7647), myoglobin (Mb, M1882) are purchased from Sigma-Aldrich (St. Louis, MO, USA). The protein molecular weight marker (Broad, 3597A, Takara Biotechnology Co., Ltd., Dalian, China) is a mixture of nine purified proteins (myoglobin, Mr 200 kDa;  $\beta$ -galactosidases, Mr 116 kDa; phosphorylase b, Mr 97.2 kDa; plasma albumin, Mr 66.4 kDa; ovalbumin, Mr 44.3 kDa; carbonic anhydrase, Mr 29.0 kDa; trypsin inhibitor, Mr 20.1 kDa; lysozyme, Mr 14.3 kDa; inhibitory peptide, 6.5 kDa). Amino propyltriethoxy silane (APTES,  $\text{H}_2\text{NCH}_2\text{CH}_2\text{Si}(\text{OC}_2\text{H}_5)_3$ ), cetylpyridinium bromide ( $\text{C}_{21}\text{H}_{38}\text{BrN}$ , CPDB), cyclohexane ( $\text{C}_6\text{H}_{12}$ ), n-butyl alcohol ( $\text{C}_4\text{H}_{10}$ ), tetraethyl orthosilicate ( $\text{C}_8\text{H}_{20}\text{O}_4\text{Si}$ , TEOS), methanol ( $\text{CH}_3\text{OH}$ ) and ethanol ( $\text{CH}_3\text{CH}_2\text{OH}$ ) are obtained from Sinopharm Chemical Reagent Co., Ltd., (Shanghai, China). Ethylene glycol methacrylate phosphate ( $\text{C}_{12}\text{H}_{19}\text{O}_8\text{P}$ , EGMP) is purchased from J&K Scientific Co., Ltd., (Beijing, China). All chemicals used are at least of analytical reagent grade unless otherwise specified. Deionized water of 18 M $\Omega$  cm is used throughout.

Human blood samples are provided by the Hospital of Northeastern University from healthy volunteers. All experiments involving human samples are performed in compliance with the relevant laws and institutional guidelines and have been approved by the ethical committee of Northeastern University. Fresh blood is collected in an additive-free tube and anti-coagulated with potassium EDTA. After the removal of red blood cells via centrifugation at 5,000 rpm for 30 min, the plasma is collected and stored at -20°C.

### **The fabrication of EGMP@SiO<sub>2</sub> microspheres**

Fibrous SiO<sub>2</sub> nanospheres are prepared according to a reported hydrothermal procedure<sup>1</sup>. Briefly, 1 g cetylpyridinium bromide, 1.8 g urea, 20 g cyclohexane and 1 g n-butyl alcohol are dissolved in 15 mL deionized water, and then 1.25 g TEOS is added under magnetic stirring. After stirring for 30 min at room temperature, and aged at 70°C for 16 h, the product fibrous SiO<sub>2</sub> is collected after centrifugation, washed with acetone and deionized water. The residual cetylpyridinium bromide is removed by calcination at 550°C for 6 h. Amino fibrous SiO<sub>2</sub> synthesized by coupling reaction. 100 mg fibrous SiO<sub>2</sub> is dispersed in 2 mL methanol, then 5 μL APTES is added under magnetic stirring. After stirring for 24 h at room temperature, the product is collected after centrifugation, washed with methanol, and the white powder amino fibrous SiO<sub>2</sub> is obtained after drying at 65°C overnight. EGMP@SiO<sub>2</sub> synthesized by addition reaction. 100 mg amino fibrous SiO<sub>2</sub> is dispersed in 2 mL ethanol, then 6 μL EGMP is added under magnetic stirring. After stirring for 24 h at room temperature, the product is collected after centrifugation, washed with ethanol, and the final product EGMP@SiO<sub>2</sub> microspheres are obtained after vacuum drying at 40°C overnight.

## Characterization

FT-IR spectra are recorded on a Nicolet 6700 spectrometer (Thermo Fisher Scientific, USA) using a KBr disk from 400 to 4000  $\text{cm}^{-1}$  with a resolution of 2.0  $\text{cm}^{-1}$ . XRD patterns are taken on a Rigaku D/max-a X-ray diffractometer (Rigaku, Japan) with graphite-monochromatized  $\text{Cu-K}\alpha$  radiation ( $\lambda=1.54056 \text{ \AA}$ ), with a step size of 0.03°. The thermal stability of the product is evaluated by using a TG-DSC simultaneous thermal analyzer (Mettler Toledo, Switzerland) within a temperature range of 25-1000°C in nitrogen atmosphere by heating at a rate of 10°C  $\text{min}^{-1}$ . The nitrogen adsorption-desorption isotherms are obtained at -196°C by using an ASAP 2020HD88 (Micromeritics Instrument, USA). SEM images are obtained on a ZEISS Ultra/Plus scanning electron microscope (ZEISS, Germany). Hydrodynamic diameter (Dh) and Zeta potential measurements are carried out by dynamic light scattering (DLS) with a Nano ZS90 (Malvern, U.K.). LC-MS/MS analysis is performed using an Easy nanoLC 1000 system (Thermo Fisher Scientific, Germany) interfaced with a Q Exactive Orbitrap mass spectrometer (Thermo Fisher Scientific, Germany) for which the database employed is Swiss-Prot filtered for the Homo sapiens taxonomy. The quantitative detection of proteins is carried out by U-3900 UV-vis spectrophotometer (Hitachi, Japan). The pH values are measured by a PB-10 pH meter (Sartorius, Germany).

### **Capturing of peptides by EGMP@SiO<sub>2</sub> microspheres**

The capturing behaviors of the synthesized 12 peptide chains on EGMP@SiO<sub>2</sub> microspheres are studied as following. Briefly, 1.0 mL 100 µg mL<sup>-1</sup> peptide sample (BR, pH 5.0) is mixed with 1 mg EGMP@SiO<sub>2</sub> microspheres at room temperature and the mixture is shaken on an oscillator vigorously for 30 min to facilitate the capture of peptide species. After centrifugation at 6000 rpm for 5 min, the supernatant is collected to quantify the residual peptide content by monitoring the absorbance at 595 nm after binding with Coomassie brilliant blue (Bradford method).

The capturing efficiency of peptide (Q) is calculated by the following equation, where C<sub>0</sub> and C<sub>1</sub> represent the original and the residual peptide concentrations (mg L<sup>-1</sup>), respectively. All tests are repeated three times.

$$Q = (C_0 - C_1) / C_0 \times 100\%$$

### **Capturing of proteins by EGMP@SiO<sub>2</sub> microspheres**

The performances of EGMP@ SiO<sub>2</sub> microspheres on protein capturing are investigated by using HSA, BSA, IgG, Trf, Cona, ConA, Lf, Mb and Lys as protein models. The selection of these 8 proteins are based on the different arginine number in their structure, and the numbers of arginine residues in these proteins are 37, 32, 26, 24, 13, 11, 6 and 2, respectively.

Briefly, 1.0 mL protein sample solution is mixed with 1 mg EGMP@SiO<sub>2</sub> microspheres at room temperature and the mixture is shaken on an oscillator vigorously for 30 min to facilitate the adsorption of protein species. After centrifugation at 6000 rpm for 5 min, the supernatant is collected to quantify the residual protein content by monitoring the absorbance at 595 nm after binding with Coomassie brilliant blue (Bradford method). The calculation of capturing efficiency of protein (Q) is same with that of peptides. All tests are repeated three times.

## **Applications**

### **Depletion of proteins by EGMP@SiO<sub>2</sub> microspheres**

For the depletion of arginine-rich proteins from human plasma by EGMP@SiO<sub>2</sub> microspheres, the human plasma sample is firstly diluted 500 times with BR buffer (pH 5.0), then 1.0 mL diluted plasma is mixed with 1 mg EGMP@SiO<sub>2</sub> microspheres under vigorous shaking for 30 min. After centrifugation at 6000 rpm for 5 min, the supernatant is collected for ensuing assay. Thereafter, EGMP@SiO<sub>2</sub> microspheres with captured proteins is prewashed with deionized H<sub>2</sub>O, mixed with 1 mL of Tris-HCl (0.05 mol L<sup>-1</sup>, pH 8.9) and shaken for 20 min to recover the captured proteins.

### **Validations of the protein depletion efficiency with LC-MS/MS**

The effectiveness of arginine-rich protein consumption is assessed using LC-MS/MS. The plasma samples are trypsinized firstly, and then the obtained peptide sample is diluted with 0.1% TFA and injected into a loading/desalting column (C18 modified silica gel, 3 mm diameter, inner diameter 100 mm, length 20 mm) and eluted onto the analytical column (C18 modified silica gel, 1.9 mm bead size, inner diameter 150 mm, length 12 cm), flow rate 200 nL min<sup>-1</sup>, unchanged in the following solvent gradient curves: 5-7% solvent B (0-2 minutes), 7-10% solvent B (3-10 minutes), 10-20% solvent B (11-50 minutes), 20-30% solvent B (51-70 minutes) and 90% solvent s (71-78 minutes). Solvent A is 0.1% TFA and solvent B is ACN / 0.1% TFA. The mass spectrometer has a scan range of 300-1400 ms<sup>-1</sup> and the database used is a Swiss-Prot filter for Homo sapiens taxonomy.

## Supporting figure

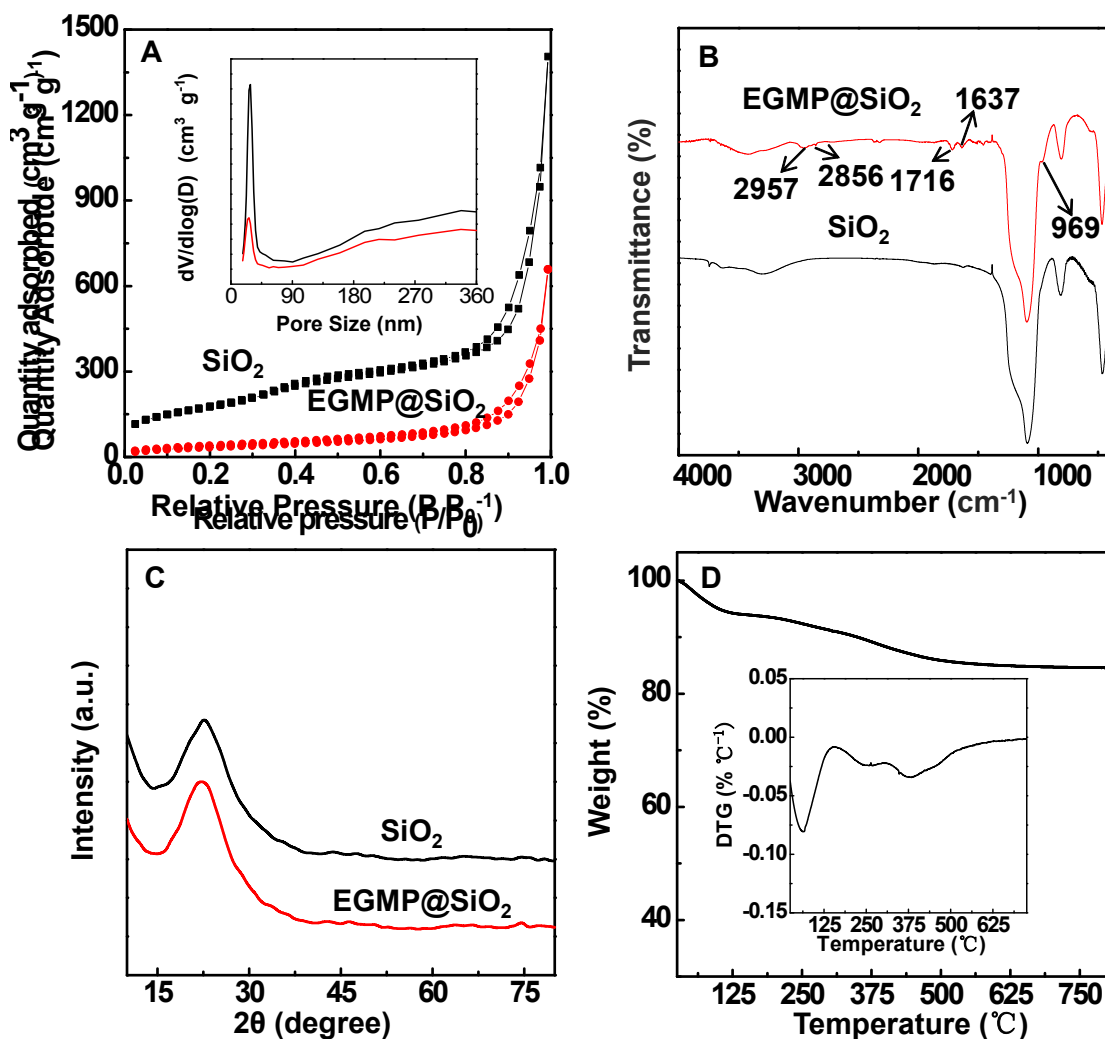

Figure S1. Nitrogen adsorption-desorption isotherms of  $\text{SiO}_2$  and  $\text{EGMP@SiO}_2$  (A); Pore size distribution of  $\text{SiO}_2$  and  $\text{EGMP@SiO}_2$  microspheres (A inset). FT-IR spectra of fibrous  $\text{SiO}_2$  and  $\text{EGMP@SiO}_2$  microspheres (B); XRD patterns of fibrous  $\text{SiO}_2$  and  $\text{EGMP@SiO}_2$  microspheres (C); TGA curves of  $\text{SiO}_2$  and  $\text{EGMP@SiO}_2$  microspheres (D); DTG curves of  $\text{SiO}_2$  and  $\text{EGMP@SiO}_2$  microspheres (D inset).



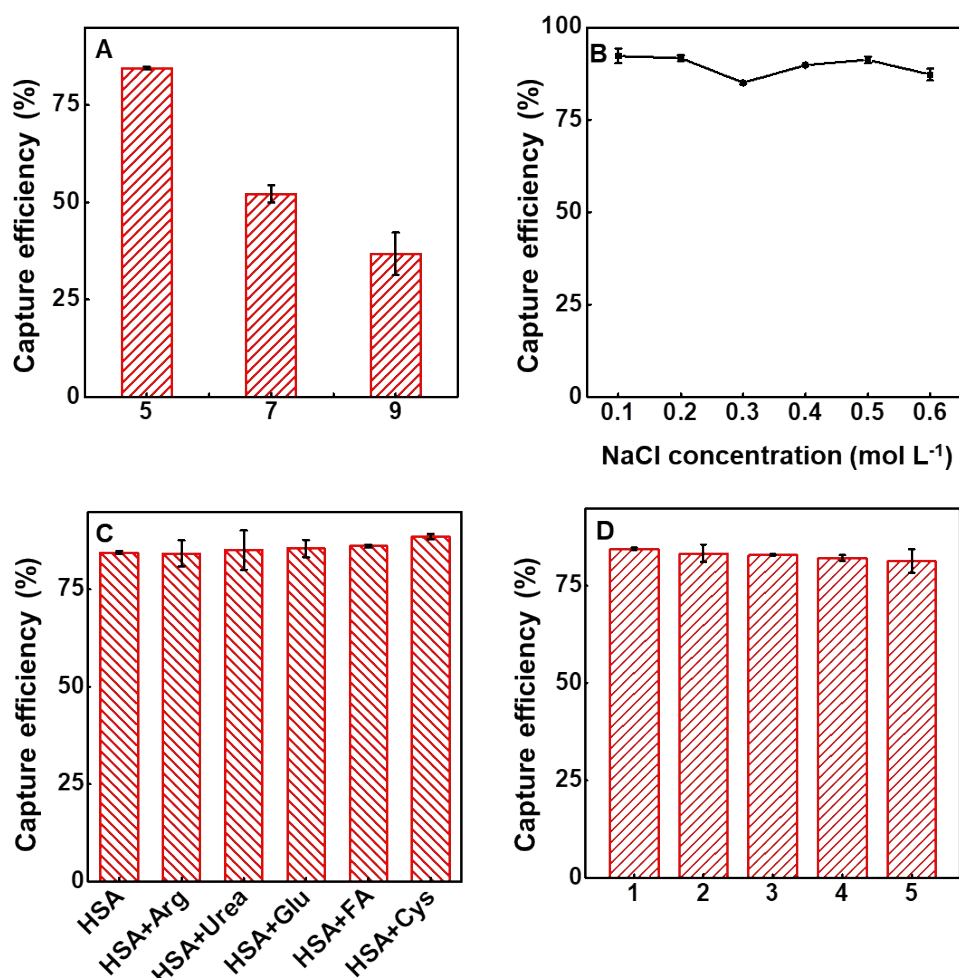

Figure S2. The effect of ionic strength on the adsorption of HSA by EGMP@SiO<sub>2</sub> microspheres (A). The effect of pH on the adsorption of HSA by EGMP@SiO<sub>2</sub> microspheres (B); The anti-interference ability of EGMP@SiO<sub>2</sub> microspheres against small molecules in plasma (C); The reusability of EGMP@SiO<sub>2</sub> microspheres for HSA adsorption/desorption (D); Protein solution: 100 mg L<sup>-1</sup>, 1.0 mL, EGMP@SiO<sub>2</sub> microspheres: 1.0 mg; adsorption time: 30 min; pH 5.0. Arginine (Arg): 80 μmol L<sup>-1</sup>; Urea, Glucose (Glu) and Cysteine (Cys) concentration: 10mmol L<sup>-1</sup>; Folic acid (FA) concentration: 10 μmol L<sup>-1</sup>.

## Supporting table

Table S1. Amino acid sequence of the designed peptide chains.

| Name   | Amino acid sequence   |
|--------|-----------------------|
| Peps1  | MKWAGATFDSGAKDAHDKSW* |
| Peps2  | MKWAGATFDSRAKDAHDKSW  |
| Peps3  | MKWAGATFDRAKDAHDKSW   |
| Peps4  | MKWAGATFRRRRKAHDKSW   |
| Peps5  | MKWAGARRRRRRRAHDKSW   |
| Peps6  | MKWVRRTFISLLKIAHDK    |
| Peps7  | MRKWVTFRISLLRIAHRD    |
| Peps8  | MKWVRRTFISLLIRAHDR    |
| Peps9  | MKWVRRTFISLLRRIAHD    |
| Peps10 | RKWARGARFDRGARDARSWRR |
| Peps11 | RRWAGATRRSGAKDRRRRSW  |
| Peps12 | MRRAGARRDSGRRDAHRRSW  |

\*M: methionine; K: lysine; W: tryptophan; A: alanine; G: glycine; T: threonine; F: phenylalanine; D: aspartic acid; S: serine; H: histidine; V: valine; I: isoleucine; L: leucine; R: arginine.

Table S2. Amino acid sequences of the selected proteins

| Protein           | Amino acid sequences                                                                                                                                                                                                                                                                                                                                                                                                                                                                                                                                                                                                                                                                                                                                                                                                                                                                                                                                                                                                                                                                                                                                                                                                                                                                                                                                                                                                                                                                                                                                                                                                                                                                                                           | Data Sources           |
|-------------------|--------------------------------------------------------------------------------------------------------------------------------------------------------------------------------------------------------------------------------------------------------------------------------------------------------------------------------------------------------------------------------------------------------------------------------------------------------------------------------------------------------------------------------------------------------------------------------------------------------------------------------------------------------------------------------------------------------------------------------------------------------------------------------------------------------------------------------------------------------------------------------------------------------------------------------------------------------------------------------------------------------------------------------------------------------------------------------------------------------------------------------------------------------------------------------------------------------------------------------------------------------------------------------------------------------------------------------------------------------------------------------------------------------------------------------------------------------------------------------------------------------------------------------------------------------------------------------------------------------------------------------------------------------------------------------------------------------------------------------|------------------------|
| Lactoferrin (Lf)  | <p>                     APRK<b>R</b>NV<b>R</b>WCTISQPEWFK<b>C</b>R<b>W</b>Q<b>R</b><br/>                     MKKLGAPSITCV<b>R</b>R<b>A</b>FALECI<b>R</b>AEKK<br/>                     AVTLDGGMVFEAG<b>R</b>DPYK<b>R</b>PVAAEI<br/>                     YGTKESPQTHYYAVAVVKKGSNFQL<br/>                     QG<b>R</b>K<b>S</b>CHTGLG<b>R</b>SAGWI[IPMGIL<b>R</b>PY<br/>                     LSWTESLEPLQGAVAKFFSASCVPID<br/> <b>R</b>QAYPNLCQLCKGEGENQCACSS<b>R</b>EP<br/>                     YFG<b>R</b>SGAFKCLQDGAGDVA<b>F</b>V<b>K</b>ETT<br/>                     VFENLPEKAD<b>R</b>DQYELLCLNNS<b>R</b>APV<br/>                     DAFKECHLAQVPSHAVVA<b>R</b>SVDGKE<br/>                     DLIWKLLSKAQEKFGKNK<b>S</b>RFQLFG<br/>                     SPPGQ<b>R</b>DLLFKDSALGFL<b>R</b>IPSKVDSA<br/>                     LYLGS<b>R</b>YLTTLKNL<b>R</b>ETAEEVK<b>A</b>RYT<br/> <b>R</b>VVWCACGPEEQKKCQQWSQQSGQ<br/>                     NVCATASTDDCIVLVLKGEADALN<br/>                     LDGGTIYTAGKCGLVPVLAEN<b>R</b>KSSK<br/>                     HSSLDCVL<b>R</b>PTEGYLAVAVVKKANE<br/>                     GLTWN<b>S</b>LKDKKSCHTAVD<b>R</b>TAGWNI<br/>                     PMGLIVNQTGSCAFDEFFSQSCAPGA<br/>                     DPK<b>S</b>R<b>L</b>CALCAGDDQGLDKCVPNSK<br/>                     EKYYGYTGAF<b>R</b>CLAEDVGDVA<b>F</b>V<b>K</b>N<br/>                     DTVWENTNGESTADWAKNLN<b>R</b>ED<b>F</b><b>R</b><br/>                     LLCLDGT<b>R</b>KPVTEAQSCHLAVAPNHA<br/>                     VVS<b>R</b>SD<b>R</b>AAHVKQVLLHQALFGKN<br/>                     GKNCPDKFCLFKSETKNLLFNDNTEC<br/>                     LAKLGG<b>R</b>PTYEEYLGTEVVTAIANLK<br/>                     KCSTSPLLEACAFL<b>R</b> </p> | RCSB Protein Data Bank |
| Conalbumin (Cona) | <p>                     APPK<b>S</b>VI<b>R</b>WCTISSPEEKCCNNL<b>R</b>DLT<br/>                     QQE<b>R</b>ISLTCVQKATYLD<b>C</b>IKAIAN<b>N</b>EA<br/>                     DAISLDGGQAFEAGLAP<b>R</b>KLKPIAAE<br/>                     VYEHTEGSTTSYYAVAVVKKGTEFTV<br/>                     NDLQGKTSCHTGLG<b>R</b>SAGWNIPIGTL<br/>                     LH<b>R</b>GAIWEGIESGSVEQAVAKFFSAS<br/>                     CVPGATIEQKLC<b>R</b>QCKGDPKTKC<b>A</b>R<b>N</b><br/>                     APYSGYSGAFHCLKDGGKGDVA<b>F</b>V<b>K</b>H<br/>                     TTVNENAPDQKDEYELLCLDGS<b>R</b>QPV<br/>                     DNYKTCNWA<b>R</b>VAAHAVVA<b>R</b>DDNKV<br/>                     EDIWSFLSKAQSDFGVDTKSDFHFLFGP<br/>                     PGKKDPVLKDLLFKDSAIMLK<b>R</b>VPSL                 </p>                                                                                                                                                                                                                                                                                                                                                                                                                                                                                                                                                                                                                                                                                                                                                                                                                                                                                                                            | RCSB Protein Data Bank |

|                    |                                                                                                                                                                                                                                                                                                                                                                                                                                                                                                                                                                                                                                                                                                                                                                                                                                                                                                                                                                                                                                                                                                                        |                           |
|--------------------|------------------------------------------------------------------------------------------------------------------------------------------------------------------------------------------------------------------------------------------------------------------------------------------------------------------------------------------------------------------------------------------------------------------------------------------------------------------------------------------------------------------------------------------------------------------------------------------------------------------------------------------------------------------------------------------------------------------------------------------------------------------------------------------------------------------------------------------------------------------------------------------------------------------------------------------------------------------------------------------------------------------------------------------------------------------------------------------------------------------------|---------------------------|
|                    | <p>MDSQLYLGFEYYSIAIQSM<b>R</b>KDQLTPS<br/> <b>P</b>REN<b>R</b>IQWCAVGKDEKSK<b>C</b>DRWSVV<br/> SNGDVECTVVDETKDCIIMKGEAD<br/> AVALDGGLVYTAGVCGLVPVMAER<br/> YDDESQCSKTDE<b>R</b>PASYFAVAVARK<br/> DSNVNWNLLKGKKSCHTAVG<b>R</b>TAG<br/> WVIPMGLIHN<b>R</b>TGTCNFDE<b>R</b>FSEGCA<br/> PGSPNS<b>R</b>LCQLCQGGGIPPEKCVAS<br/> SHEKYFGYT<b>G</b>AL<b>R</b>CLVEKGDVAFIQH<br/> STVEENTGGKNKADWAKNLQMDDF<br/> ELLCTDG<b>R</b>RANVMDY<b>R</b>ECNLAEVPT<br/> HAVVV<b>R</b>PEKANK<b>I</b>RDLLE<b>R</b>QEK<b>R</b>FG<br/> VNGSEKSKFMMFESQNKDLLFKDLT<br/> KCLFKV<b>R</b>EGTTYKKEFLGDKFYTVIS<br/> SLKTCNPSDILQMCSFLEGK</p>                                                                                                                                                                                                                                                                                                                                                                                                                                                                                                           |                           |
| Transferring (Trf) | <p>KTV<b>R</b>WCAVSEHEATK<b>C</b>QSF<b>R</b>DHMKS<br/> VIPSDGPSVACVKKASYLDC<b>I</b>RAIAAN<br/> EADAVTLDAGLVYDAYLAPNNLKPV<br/> VAEFYGSKEDPQTFYYAVAVVKKDS<br/> GFQMNQL<b>R</b>GKKSCHTGLG<b>R</b>SAGWNI<br/> PIGLLYCDLPEP<b>R</b>KPLEKAVANFFSGS<br/> CAPCADGTD<b>F</b>PQLCQLCPGCGCSTLN<br/> QYFGYSGAFKCLKDGAGDVAFVKHS<br/> TIFENLANNKAK<b>R</b>DQYELLCLDNT<b>R</b>K<br/> PVDEYKDCHLAQVPSHTVV<b>A</b>RSMGG<br/> KEDLIWELLNQAQEHFGKDKSKEFQL<br/> FSSPHGKDLLFKDSA<b>H</b>GFLKVPP<b>R</b>MD<br/> AKMYLGYEYVTA<b>I</b>RNL<b>R</b>EGTCPEAPT<br/> DECKPVKWCALSHHE<b>R</b>LK<b>C</b>DEWSVN<br/> SVGKIECVSAETTEDCIAKIMNGEADA<br/> MSLDGGFVYIAGKCGLVPVLAENYN<br/> KSDNCEDTPEAGYFAVAVVKKSASD<br/> LTWDNLKGKKSCHTAVG<b>R</b>TAGWNIP<br/> MGLLYNKIMH<b>C</b>R<b>F</b>DEFFSEGCAPGSK<br/> KDSSLCKLCMGSGLN<b>L</b>CEPNNKEGY<br/> YGYTGAF<b>R</b>CLVEKGDVAFVKHQ<b>T</b>VP<br/> QNTGGKNPDPWAKNLNEKDYELLCL<br/> DGT<b>R</b>KPVEEYANCHLA<b>R</b>APNHAVVT<br/> <b>R</b>KDKEACVHKIL<b>R</b>QQQHKFGSNVTD<br/> CSGNFCL<b>F</b>RSETKDLL<b>F</b>RDDTVCLAK<br/> LHD<b>R</b>NTYEKYL<b>G</b>EEYVKA<b>V</b>GNL<b>R</b>KC<br/> STSSLLEACT<b>F</b>RRP</p> | RCSB Protein<br>Data Bank |

|                                   |                                                                                                                                                                                                                                                                                                                                                                                                                                                                                                                                                                                                                                                                                                                                                     |                               |
|-----------------------------------|-----------------------------------------------------------------------------------------------------------------------------------------------------------------------------------------------------------------------------------------------------------------------------------------------------------------------------------------------------------------------------------------------------------------------------------------------------------------------------------------------------------------------------------------------------------------------------------------------------------------------------------------------------------------------------------------------------------------------------------------------------|-------------------------------|
| <p>Human plasma albumin (HSA)</p> | <p>DAHKSEVAHRFKDLGGEENFKALVLIA<br/> FAQYLQQCPFEDHVKIVNEVIEFAKTC<br/> VADESAENCDKSLHTLFGDKLCTVAT<br/> LRETYGEMADCCAKQEPERNECFLO<br/> HKDDNPNLPNLPRLVPEVDVMCTA<br/> FHDNEETFLKKYEIARRHPYFYAPELL<br/> FFAKRYKAAFTECCQAADKAACLLP<br/> KLDEL RDEGKASSAKQRLKCASLQKF<br/> GERAFKAWAVARLSQRFPKAEFAEV<br/> SKLVTDLTKVHTECCHGDLLECADD<br/> RADLAKYICENQKSISSEKKECKEPL<br/> LEKSHCIAEVENDEMPADLPSLAADF<br/> VESKDVCKNYAEAKDVFLGMFLYEY<br/> ARRHPDYSVLLLLRLAKTYETTLEKC<br/> CAAADPHECYAKVFDEFKPLVEEPQN<br/> LIKQNCLEFEQLGEYKFQNALLVRYT<br/> KKVPQVSTPTLVEVSRNLGKVGSKCC<br/> KHPEAKRMPCAEKYLSVVLNQLCVL<br/> HEKTPVSDRVTKCTESLVNRRPCFS<br/> ALEVDETYVPKEFNAETFTFHADICTL<br/> SEKERQIKKQTALVELVKHKPKATKE<br/> QLKAVMDDFAAFVEKCKADDKETC<br/> FAEEGKKLVAASQAALGL</p> | <p>RCSB Protein Data Bank</p> |
| <p>Immunoglobulin G (IgG)</p>     | <p>MDWTWRFLFVVAATGVQSQMQVV<br/> QSGAEVKKPGSSVTVSCKASGGTFSN<br/> YAISWVRQAPGQGLEWMGGIPLFGT<br/> PTYSQNFQGRVTITADKSTSTAHMELI<br/> SLRSEDTAVYYCATDRYRQANFDRA<br/> RVGWFDWPWGQGLTVTVSSASTKGPS<br/> VFPLAPSSKSTSGGTAALGCLVKDYFP<br/> EPVTVSWNSGALTSGVHTFPAVLQSS<br/> GLYSLSSVVTVPSSSLGTQTYICNVNH<br/> KPSNTKVDKKVEPKSCDKTHTCPPCP<br/> APELLGPSVFLFPPKPKDTLMISRTPEV<br/> TCVVVDVSHEDPEVKFNWYVDGVEV<br/> HNAKTKPREEQYNSTYRVVSVLTVL<br/> HQDWLNGKEYKCKVSNKLPAPIEKTI<br/> SKAKGQPREPQVYTLPPSRDELTKNQ<br/> VSLTCLVKGFYPSDIAVEWESNGQPE<br/> NNYKTTTPVLDSGDSFFLYSKLTVDK<br/> SRWQQGNVFSCSVMHEALHNHYTQK<br/> SLSLSPGK</p>                                                                                                                                        | <p>NCBI</p>                   |

|                          |                                                                                                                                                                                                                                                                                                                                      |                           |
|--------------------------|--------------------------------------------------------------------------------------------------------------------------------------------------------------------------------------------------------------------------------------------------------------------------------------------------------------------------------------|---------------------------|
| Lysozyme (Lys)           | KVFG <b>R</b> CELAAAMK <b>R</b> HGLDNY <b>R</b> GYSL<br>GNWVCAAKFESNFNTQATN <b>R</b> NTDGS<br>TDYGILQINS <b>R</b> WWCNDG <b>R</b> TPGS <b>R</b> NL<br>CNIPCSALLSSDITASVNC AKKIVSDG<br>NGMNAWVAW <b>R</b> <b>R</b> CKGTDVQAW <b>R</b><br>G <b>R</b> L                                                                                 | RCSB Protein<br>Data Bank |
| Concanavalin A<br>(ConA) | ADTIVAVELDTHPNTDIGDPSYPHIGI<br>DIKSV <b>R</b> SKKTAKWNMQNGKVGTAHI<br>IYNSVDK <b>R</b> LSAVVSYPNADSATVSHD<br>VDLDNVLP EWV <b>R</b> VGLSASTGLYKET<br>NTILSWSFTSKLKSNSTHETNALHFMF<br>NQFSKDQKDLILQGDATTGTDGNLEL<br>T <b>R</b> VSSNGSPQGSSV <b>G</b> RALFYAPVHIW<br>ESSAVVASFEATFTFLIKSPDSHPADGI<br>AFFISNIDSSIPSGSTG <b>R</b> LLGLFPDAN | RCSB Protein<br>Data Bank |
| Myoglobin (Mb)           | GLSDGEWQQVLNVWGKVEADIAGH<br>GQEVLI <b>R</b> LFTGHPETLEKFDKFHLKTE<br>AEMKASEDLKKHGTVVLTALGGILK<br>KKGHHEAELKPLAQSHATKHKIPIKY<br>LEFISDAIIHVLHSHKHPFGADAQGAMT<br>KALEL <b>F</b> RNDIAAKYKELGFQG                                                                                                                                        | RCSB Protein<br>Data Bank |

Table S3. Low abundance proteins in liquid supernatant after treating with EGMP@SiO<sub>2</sub> microspheres.

| NO. | Protein Name                                    | UniProt ID | Abundance % |
|-----|-------------------------------------------------|------------|-------------|
| 1   | HUMAN Keratin, type I cytoskeletal 10           | P13645     | 12.405484   |
| 2   | HUMAN Keratin, type II cytoskeletal 2 epidermal | P35908     | 2.816092    |
| 3   | HUMAN Keratin, type I cytoskeletal 14           | P02533     | 1.062239    |
| 4   | HUMAN Keratin, type II cytoskeletal 5           | P13647     | 0.972775    |
| 5   | HUMAN Hornerin                                  | Q86YZ3     | 0.188619    |
| 6   | HUMAN Keratin, type I cytoskeletal 16           | P08779     | 0.173143    |
| 7   | HUMAN Rootletin                                 | Q5TZA2     | 0.126253    |
| 8   | HUMAN Histone H3.3C                             | Q6NXT2     | 0.116485    |
| 9   | HUMAN Desmoplakin                               | P15924     | 0.115231    |
| 10  | HUMAN Junction plakoglobin                      | P14923     | 0.10671     |
| 11  | HUMAN Keratin, type II cytoskeletal 6A          | P02538     | 0.102469    |
| 12  | HUMAN Calmodulin-like protein 5                 | Q9NZT      | 0.09502     |
| 13  | HUMAN Immunoglobulin kappa variable 3D-7        | A0A0C4DH55 | 0.09242     |
| 14  | HUMAN Dermcidin                                 | P81605     | 0.082729    |
| 15  | HUMAN Cystatin-A                                | P01040     | 0.064079    |
| 16  | HUMAN Inhibitor of growth protein 5             | Q8WYH8     | 0.054758    |
| 17  | HUMAN RAC-gamma serine/threonine-protein kinase | Q9Y243     | 0.052587    |
| 18  | HUMAN Filaggrin-2                               | Q5D862     | 0.040375    |
| 19  | HUMAN Keratin, type II cuticular Hb5            | P78386     | 0.035821    |
| 20  | HUMAN Keratinocyte proline-rich protein         | Q5T749     | 0.032965    |
| 21  | HUMAN Pachytene checkpoint protein 2 homolog    | Q15645     | 0.032284    |

|    |                                           |            |          |
|----|-------------------------------------------|------------|----------|
| 22 | HUMAN Caspase-14                          | P31944     | 0.030493 |
| 23 | HUMAN Collagen alpha-5(VI) chain          | A8TX70     | 0.026635 |
| 24 | HUMAN Uncharacterized protein ZSWIM9      | Q86XI8     | 0.026369 |
| 25 | HUMAN Prelamin-A/C                        | P02545     | 0.026334 |
| 26 | HUMAN Ankyrin-3                           | Q12955     | 0.025991 |
| 27 | HUMAN Histone H1.2                        | P16403     | 0.023372 |
| 28 | HUMAN Protein POF1B                       | Q8WVV4     | 0.023281 |
| 29 | HUMAN Lysozyme C                          | P61626     | 0.022193 |
| 30 | HUMAN Annexin A2                          | P07355     | 0.021192 |
| 31 | HUMAN Lactotransferrin                    | P02788     | 0.019943 |
| 32 | HUMAN Immunoglobulin heavy variable 4-28  | A0A0C4DH34 | 0.017412 |
| 33 | HUMAN Speriolin                           | Q76KD6     | 0.016848 |
| 34 | HUMAN Desmocollin-1                       | Q08554     | 0.01665  |
| 35 | HUMAN Keratin, type I cytoskeletal 17     | Q04695     | 0.016528 |
| 36 | HUMAN Immunoglobulin heavy variable 3-73  | A0A0B4J1V6 | 0.014866 |
| 37 | HUMAN Immunoglobulin heavy variable 6-1   | A0A0B4J1U7 | 0.014248 |
| 38 | HUMAN Protein S100-A7                     | P31151     | 0.013838 |
| 39 | HUMAN Immunoglobulin heavy variable 3-15  | A0A0B4J1V0 | 0.012791 |
| 40 | HUMAN FACT complex subunit SSRP1          | Q08945     | 0.012438 |
| 41 | HUMAN Keratin, type II cytoskeletal 74    | Q7RTS7     | 0.012156 |
| 42 | HUMAN Cornifin-A                          | P35321     | 0.011594 |
| 43 | HUMAN Small proline-rich protein 2A       | P35326     | 0.011419 |
| 44 | HUMAN Ubiquitin-60S ribosomal protein L40 | P62987     | 0.010993 |



|    |                                                                                          |        |          |
|----|------------------------------------------------------------------------------------------|--------|----------|
| 45 | HUMAN Fatty acid-binding protein 5                                                       | Q01469 | 0.009956 |
| 46 | HUMAN Signal transducer and activator of transcription 5B                                | P51692 | 0.009483 |
| 47 | HUMAN Pre-mRNA-processing factor 19                                                      | Q9UMS4 | 0.007965 |
| 48 | HUMAN Splicing factor, proline- and glutamine-rich                                       | P23246 | 0.007455 |
| 49 | HUMAN Putative bifunctional UDP-N-acetylglucosamine transferase and deubiquitinase ALG13 | Q9NP73 | 0.00726  |
| 50 | HUMAN Elongation factor 2                                                                | P13639 | 0.006395 |
| 51 | HUMAN Ankyrin repeat and SAM domain-containing protein 1A                                | Q92625 | 0.006353 |
| 52 | HUMAN RNA-binding protein 8A                                                             | Q9Y5S9 | 0.005219 |
| 53 | HUMAN Nucleosome-remodeling factor subunit BPTF                                          | Q12830 | 0.005193 |
| 54 | HUMAN Desmoglein-1                                                                       | Q02413 | 0.004937 |
| 55 | HUMAN Histone deacetylase 1                                                              | Q13547 | 0.00484  |
| 56 | HUMAN Signal transducer and activator of transcription 3                                 | P40763 | 0.003867 |
| 57 | HUMAN Keratin, type I cuticular Ha1                                                      | Q15323 | 0.003702 |
| 58 | HUMAN Suppressor of tumorigenicity 7 protein                                             | Q9NRC1 | 0.003656 |
| 59 | HUMAN Filamin-B                                                                          | O75369 | 0.003604 |
| 60 | HUMAN Gamma-glutamylcyclotransferase                                                     | O75223 | 0.003208 |
| 61 | HUMAN Prolactin-inducible protein                                                        | P12273 | 0.002853 |
| 62 | HUMAN Antileukoproteinase                                                                | P03973 | 0.002758 |
| 63 | HUMAN Myosin-9                                                                           | P35579 | 0.002746 |
| 64 | HUMAN Suprabasin                                                                         | Q6UWP8 | 0.002745 |
| 65 | HUMAN Filaggrin                                                                          | P20930 | 0.00265  |
| 66 | HUMAN Plakophilin-1                                                                      | Q13835 | 0.002429 |

|    |                                                                 |        |          |
|----|-----------------------------------------------------------------|--------|----------|
| 67 | HUMAN Heterogeneous nuclear ribonucleoproteins A2/B1            | P22626 | 0.00238  |
| 68 | HUMAN FACT complex subunit SPT16                                | Q9Y5B9 | 0.002346 |
| 68 | HUMAN Pre-mRNA-splicing factor ATP-dependent RNA helicase DHX15 | O43143 | 0.0022   |
| 70 | HUMAN Nucleophosmin                                             | P06748 | 0.001935 |
| 71 | HUMAN Keratin, type II cytoskeletal 1b                          | Q7Z794 | 0.001883 |
| 72 | HUMAN Dipeptidyl peptidase 4                                    | P27487 | 0.001747 |
| 73 | HUMAN Clathrin heavy chain 1                                    | Q00610 | 0.001719 |
| 74 | HUMAN X-ray repair cross-complementing protein 6                | P12956 | 0.001658 |
| 75 | HUMAN Probable ATP-dependent RNA helicase DDX5                  | P17844 | 0.001537 |
| 76 | HUMAN Prostaglandin E synthase 3                                | Q15185 | 0.001426 |
| 77 | HUMAN Heterogeneous nuclear ribonucleoprotein F                 | P52597 | 0.00123  |
| 78 | HUMAN Keratin, type II cytoskeletal 78                          | Q8N1N4 | 0.001092 |
| 79 | HUMAN Cathepsin D                                               | P07339 | 0.000979 |
| 80 | HUMAN ATP-citrate synthase                                      | P53396 | 0.000955 |
| 81 | HUMAN SUMO-activating enzyme subunit 2                          | Q9UBT2 | 0.000926 |
| 82 | HUMAN Polypyrimidine tract-binding protein 1                    | P26599 | 0.000818 |
| 83 | HUMAN DNA replication licensing factor MCM4                     | P33991 | 0.000739 |
| 84 | HUMAN Protein kinase C theta type                               | Q04759 | 0.000702 |
| 85 | HUMAN Twinfilin-1                                               | Q12792 | 0.000655 |
| 86 | HUMAN Transketolase                                             | P29401 | 0.000591 |
| 87 | HUMAN Annexin A1                                                | P04083 | 0.000585 |
| 88 | HUMAN GTP-binding nuclear protein Ran                           | P62826 | 0.000568 |
| 89 | HUMAN Heat shock cognate 71 kDa protein                         | P11142 | 0.000544 |

|     |                                                |        |          |
|-----|------------------------------------------------|--------|----------|
| 90  | HUMAN MOB kinase activator 2                   | Q70IA6 | 0.00052  |
| 91  | HUMAN WAP four-disulfide core domain protein 2 | Q14508 | 0.000271 |
| 92  | HUMAN E3 ubiquitin-protein ligase RBX1         | P62877 | 0.000261 |
| 93  | HUMAN Protein S100-A9                          | P06702 | 0.000255 |
| 94  | HUMAN Transmembrane protein 87A                | Q8NBN3 | 0.000231 |
| 95  | HUMAN Serine/threonine-protein kinase RIO2     | Q9BVS4 | 0.000185 |
| 96  | HUMAN Protein argonaute-1                      | Q9UL18 | 0.000167 |
| 97  | HUMAN Synaptopodin-2                           | Q9UMS6 | 0.000159 |
| 98  | HUMAN Kinesin-like protein KIF26B              | Q2KJY2 | 0.000132 |
| 99  | HUMAN Protein TASOR 2                          | Q5VWN6 | 0.000121 |
| 100 | HUMAN Keratin, type II cytoskeletal 3          | P12035 | 0.000105 |

## Notes and references

- 1 A. E. Visser, R. P. Swatloski, W. M. Reichert, R. Mayton, S. Sheff, A. Wierzbicki, J. H. Davis and R. D. Rogers, *Chem Commun*, 2001, 10, 135.
